# Supplementary material for: Bifunctional Solid Catalysts for the Selective Conversion of Fructose to 5-Hydroxymethylfurfural
Source: Springer Nature journal article supplement (doi:10.1007/s11244-010-9560-2), 2010-05-28
Supplement: MOESM1 [file 5786152]

*Supporting Information for*

Bifunctional Solid Catalysts for the Selective Conversion of  
Fructose to 5-Hydroxymethylfurfural

Anthony J. Crisci, Mark H. Tucker, James A. Dumesic, Susannah L. Scott

**Table of contents**

|                                                                                | <b>Page</b> |
|--------------------------------------------------------------------------------|-------------|
| <b>Figure S1</b> Low angle XRD of Tp-SBA-15 and Taa-SBA-15                     | S2          |
| <b>Figure S2</b> N <sub>2</sub> Adsorption/Desorption Isotherms for Tp-SBA-15  | S3          |
| <b>Figure S3</b> N <sub>2</sub> Adsorption/Desorption Isotherms for Taa-SBA-15 | S3          |

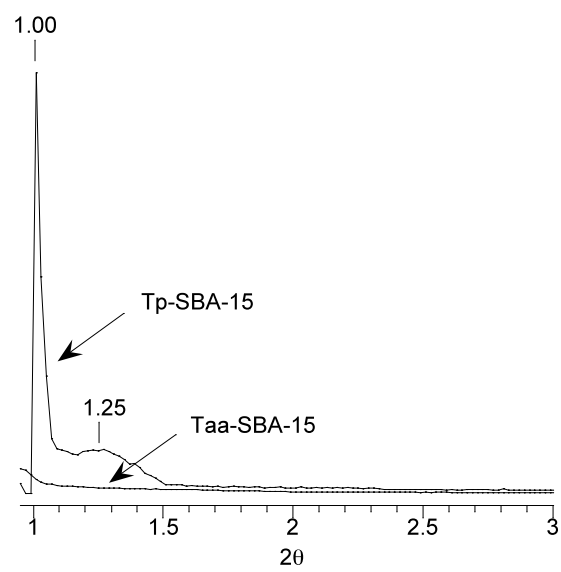

**Figure S1.** Low angle XRD of Tp-SBA-15 and Taa-SBA-15

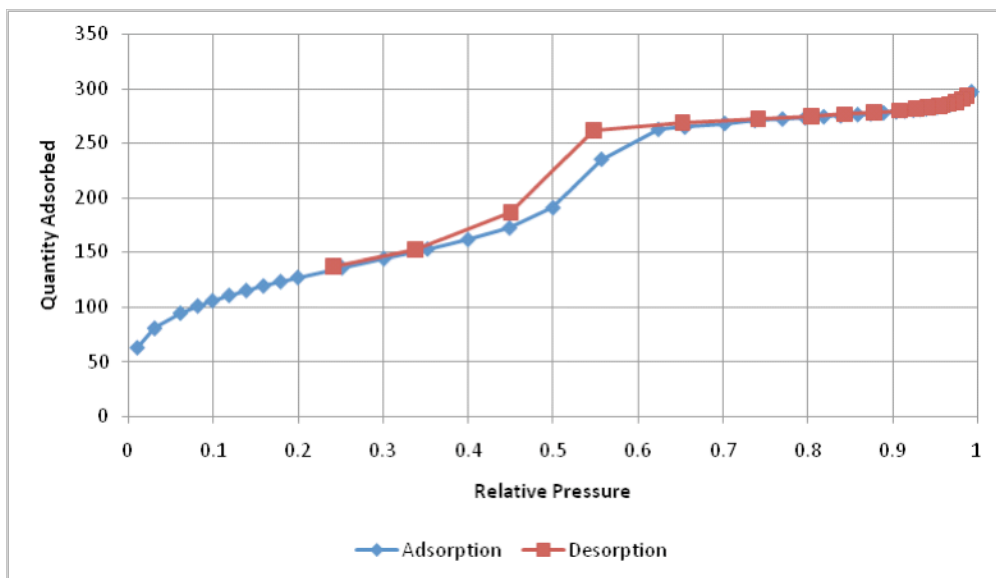

**Figure S2.** N<sub>2</sub> Adsorption/Desorption Isotherms for Tp-SBA-15

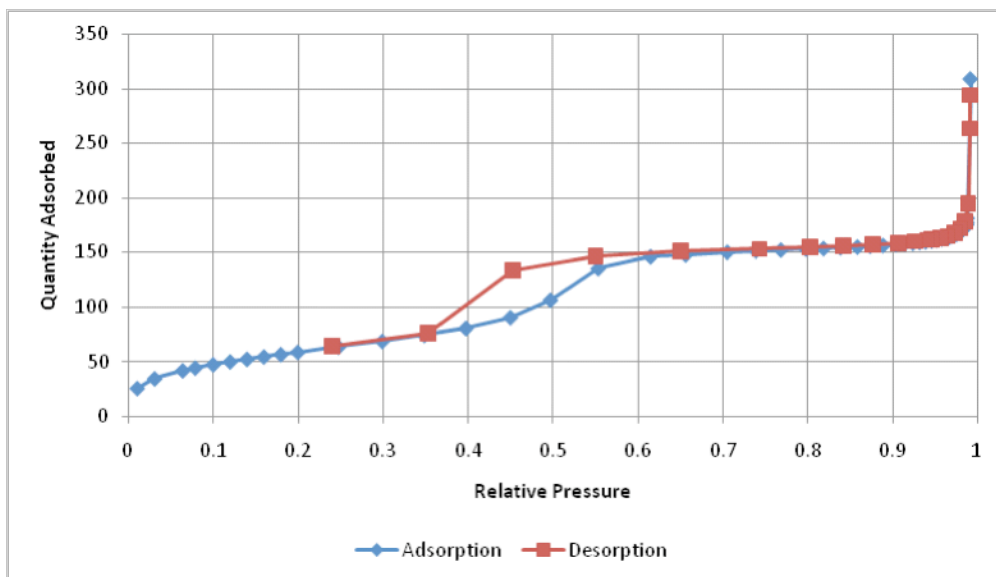

**Figure S3.** N<sub>2</sub> Adsorption/Desorption Isotherms for Taa-SBA-15
